# Supplementary material for: Functional guild dynamics in a single-sludge shortcut nitrogen and phosphorus removal reactor: a modeling study
Source: Royal Society of Chemistry journal article supplement (doi:10.1039/d3ew00562c), 2023-01-01
Supplement: d3ew00562c1.pdf [file d3ew00562c1.pdf]

## Supporting information

### Functional guild dynamics in a single-sludge shortcut nitrogen and phosphorus removal reactor: a modeling study

Quan Yuan<sup>1,2,3</sup>, Zhen Jia<sup>2</sup>, Paul Roots<sup>2</sup>, Fabrizio Sabba<sup>2,4</sup>, George Wells<sup>2\*</sup>

<sup>1</sup>School of Ecology and Environment, Beijing Technology and Business University, Beijing, China

<sup>2</sup>Department of Civil and Environmental Engineering, Northwestern University, 2145 Sheridan Road, Evanston, IL, 60208, USA.

<sup>3</sup>State Key Joint Laboratory of Environment Simulation and Pollution Control, School of Environment, Tsinghua University, Beijing 100084, China

<sup>4</sup>Black & Veatch, USA

Corresponding author: George Wells [george.wells@northwestern.edu]

#### 1 model set-up and functional guilds calculation

Functional guilds including AOB, NOB, PAOs, and DPAOs were quantified with rate equations and parameter values from Simba# inCTRL ASM matrix as shown below:

$$\text{Net specific growth rate of AOB (d}^{-1}\text{)} = \mu_{\text{AOB}} = \frac{\hat{\mu}_{\text{AOB}} \frac{S_{\text{NH}_x}}{S_{\text{NH}_x} + K_{\text{NH}_x, \text{AOB}}} \frac{S_{\text{O}_2}}{S_{\text{O}_2} + K_{\text{O}_2, \text{AOB}}} \frac{S_{\text{PO}_4}}{S_{\text{NO}_2} + S_{\text{NO}_3}} \frac{S_{\text{ALK}}}{K_{\text{O}_2, \text{AOB}} + K_{\text{ALK, AOB}}} - b_{\text{AOB, O}_2} \frac{S_{\text{O}_2}}{S_{\text{O}_2} + K_{\text{O}_2, \text{AOB}}}}{\frac{-b_{\text{AOB, NO}_x} \frac{S_{\text{NO}_2}}{S_{\text{NO}_2} + S_{\text{NO}_3}} \frac{S_{\text{NO}_3}}{K_{\text{NO}_x, \text{AOB}}} \frac{S_{\text{O}_2}}{K_{\text{O}_2, \text{AOB}}} - b_{\text{AOB, ANA}}}{S_{\text{NO}_2} + S_{\text{NO}_3} + K_{\text{NO}_x, \text{ANB}} S_{\text{O}_2} + K_{\text{O}_2, \text{AOB}}}}$$

Where:

$\hat{\mu}_{\text{AOB}}$  = maximum specific growth rate of AOB (d<sup>-1</sup>)=0.9

$S_{\text{NH}_x}$  = concentration of NH<sub>4</sub><sup>+</sup> + NH<sub>3</sub> (mgN/L)

$K_{\text{NH}_x, \text{AOB}}$  = AOB half saturation coefficient for (NH<sub>4</sub><sup>+</sup> + NH<sub>3</sub>) (mgN/L)=0.7

$S_{\text{O}_2}$  = concentration of dissolved O<sub>2</sub> (mgO<sub>2</sub>/L)

$K_{\text{O}_2, \text{AOB}}$  = AOB half saturation coefficient for dissolved O<sub>2</sub> (mgO<sub>2</sub>/L)=0.25

$S_{PO4}$  = concentration of dissolved  $PO_4^{3-}$  (mgP/L)

$K_{PO4,ANB}$  = nitrifier nutrient half saturation coefficient for  $PO_4^{3-}$  (mgP/L)=0.001

$S_{ALK}$  = concentration of alkalinity (meq/L)

$K_{ALK,AOB}$  = AOB half saturation coefficient for alkalinity (meq/L)=0.5

$\hat{b}_{AOB,O_2}$  = maximum specific aerobic decay rate of AOB ( $d^{-1}$ )=0.17

$\hat{b}_{AOB,NOx}$  = maximum specific anoxic decay rate of AOB ( $d^{-1}$ )=0.1

$S_{NO3}$  = concentration of dissolved  $NO_3^-$  (mgN/L)

$S_{NO2}$  = concentration of dissolved  $NO_2^-$  (mgN/L)

$K_{NOx,ANO}$  = nitrifier half saturation for anoxic conditions (mgN/L)=0.03

$\hat{b}_{AOB,ANA}$  = maximum specific anaerobic decay rate of AOB ( $d^{-1}$ )=0.05

$$\text{Net specific growth rate of NOB } (d^{-1}) = \hat{\mu}_{NOB} = \frac{S_{NO2} S_{O_2} S_{NHx} S_{PO4} S_{ALK}}{\hat{\mu}_{NOB} S_{NO2} + K_{NO2,NOB} S_{O_2} + K_{O2,NOB} S_{NHx} + K_{NHx,ANB} S_{PO4} + K_{PO4,ANB} S_{ALK} + K_{ALK,AOB} S_{NO2} + S_{NO3} - \hat{b}_{NOB,O_2} \frac{S_{O_2}}{S_{O_2} + K_{O2,NOB}} - \hat{b}_{NOB,NOx} \frac{S_{NO2}}{S_{NO2} + S_{NO3} + K_{NOx,ANB} S_{O_2} + K_{O2,NOB}} - \hat{b}_{NOB,ANA} \frac{K_{NOx,AOB}}{K_{O2,NOB}}} {S_{NO2} + S_{NO3} + K_{NOx,ANB} S_{O_2} + K_{O2,NOB}}$$

Where:

$\hat{\mu}_{NOB}$  = maximum specific growth rate of NOB ( $d^{-1}$ )=0.7

$K_{NO2,NOB}$  = NOB half saturation coefficient for  $NO_2^-$  (mgN/L)=0.1

$K_{O2,NOB}$  = NOB half saturation coefficient for dissolved  $O_2$  ( $mgO_2/L$ )=0.1

$K_{NHx,ANB}$  = nitrifier nutrient half saturation coefficient for  $(NH_4^+ + NH_3)^-$  (mgN/L)=0.001

$K_{ALK,NOB}$  = NOB half saturation coefficient for alkalinity (meq/L)=0.5

$\hat{b}_{NOB,O_2}$  = maximum specific aerobic decay rate of NOB ( $d^{-1}$ )=0.15

$\hat{b}_{NOB,NOx}$  = maximum specific anoxic decay rate of NOB ( $d^{-1}$ )=0.07

$\hat{b}_{NOB,ANA}$  = maximum specific anaerobic decay rate of NOB ( $d^{-1}$ )=0.04

Specific growth rate of PAOs on PHA and  $O_2$  ( $d^{-1}$ ) =  $\mu_{PAO,O_2}$  =

$$\hat{\mu}_{PAO} = \frac{\frac{X_{PHA}}{X_{PAO}} \frac{S_{O_2}}{S_{O_2} + K_{O_2,OHO}} \frac{S_{NHx}}{S_{NHx} + K_{NHx,OHO}} \frac{S_{PO_4}}{S_{PO_4} + K_{PO_4,PAO}} \frac{S_{ALK}}{S_{ALK} + K_{ALK}}}{\frac{X_{PHA}}{X_{PAO}} + K_{PHA}}$$

Where:

$\hat{\mu}_{PAO}$  = maximum specific growth rate of PAOs (d<sup>-1</sup>)=0.95

$X_{PHA}$  = concentration of polyhydroxyalkanonates-PHAs (mgCOD/L)

$X_{PAO}$  = concentration of PAOs (mgCOD/L)

$K_{PHA}$  = half saturation coefficient for PHA (mgCOD/L) =0.1

$K_{O_2,OHO}$  = *OHO and PAO* half saturation coefficient for dissolved O<sub>2</sub> (mgO<sub>2</sub>/L) =0.05

$K_{NHx,OHO}$  = *OHO and PAO* nutrient half saturation coefficient for (NH<sub>3</sub>+NH<sub>4</sub><sup>+</sup>) (mgN/L) =0.001

$K_{PO_4,PAO}$  = *PAO* half saturation coefficient for PO<sub>4</sub><sup>3-</sup> (mgP/L) =0.15

$K_{ALK}$  = *PAO* half saturation coefficient for alkalinity (mgN/L) =0.1

Specific growth rate of PAOs on PHA and NO<sub>2</sub><sup>-</sup> (d<sup>-1</sup>) =  $\mu_{PAO,NO_2}$  =

$$\hat{\mu}_{PAO} \eta_{anox,PAO} = \frac{\frac{X_{PHA}}{X_{PAO}} \frac{S_{NO_2}}{S_{NO_2} + K_{NO_2,OHO}} \frac{K_{O_2,OHO}}{S_{O_2} + K_{O_2,OHO}} \frac{S_{NHx}}{S_{NHx} + K_{NHx,OHO}} \frac{S_{PO_4}}{S_{PO_4} + K_{PO_4,PAO}} \frac{S_{ALK}}{S_{ALK} + K_{ALK}}}{\frac{X_{PHA}}{X_{PAO}} + K_{PHA}}$$

Where:

$\eta_{anox,PAO}$  = PAO anoxic growth factor =0.33

$K_{NO_2,OHO}$  = *PAO and OHO* half saturation coefficient for NO<sub>2</sub><sup>-</sup> (mgN/L) =0.05

Specific growth rate of PAOs on PHA and NO<sub>3</sub><sup>-</sup> (d<sup>-1</sup>) =  $\mu_{PAO,NO_3}$  =

$$\hat{\mu}_{PAO} \eta_{anox,PAO} = \frac{\frac{X_{PHA}}{X_{PAO}} \frac{S_{NO_3}}{S_{NO_3} + K_{NO_3,OHO}} \frac{K_{NO_2,OHO}}{S_{NO_2} + K_{NO_2,OHO}} \frac{K_{O_2,OHO}}{S_{O_2} + K_{O_2,OHO}} \frac{S_{NHx}}{S_{NHx} + K_{NHx,OHO}} \frac{S_{PO_4}}{S_{PO_4} + K_{PO_4,PAO}} \frac{S_{ALK}}{S_{ALK} + K_{ALK}}}{\frac{X_{PHA}}{X_{PAO}} + K_{PHA}}$$

Where:

$K_{NO_3,OHO}$  = *PAO and PAO* half saturation coefficient for NO<sub>3</sub><sup>-</sup> (mgN/L) =0.1

Specific PHA storage rate from VFAs by PAOs (d<sup>-1</sup>):=

$$q_{PAO,PHA} = \frac{\frac{X_{PP,LO}}{X_{PAO}} \frac{S_{VFA}}{S_{VFA} + K_{STORE,VFA}} \frac{S_{ALK}}{S_{ALK} + K_{ALK}}}{\frac{X_{PP,LO}}{X_{PAO}} + K_{PP,LO}}$$

Where:

$q_{PAO,PHA}$  = PHA storage rate by PAOs (d<sup>-1</sup>) = 6

$K_{PP,LO}$  = polyphosphate half saturation for storage (mgP/mgCOD)=0.01

$S_{VFA}$  = concentration of volatile fatty acids (mgCOD/L)

$K_{STORE,VFA}$  = VFA half saturation for storage (mgCOD/L)=1

## 2 Ammonium oxidation rate under various scenarios

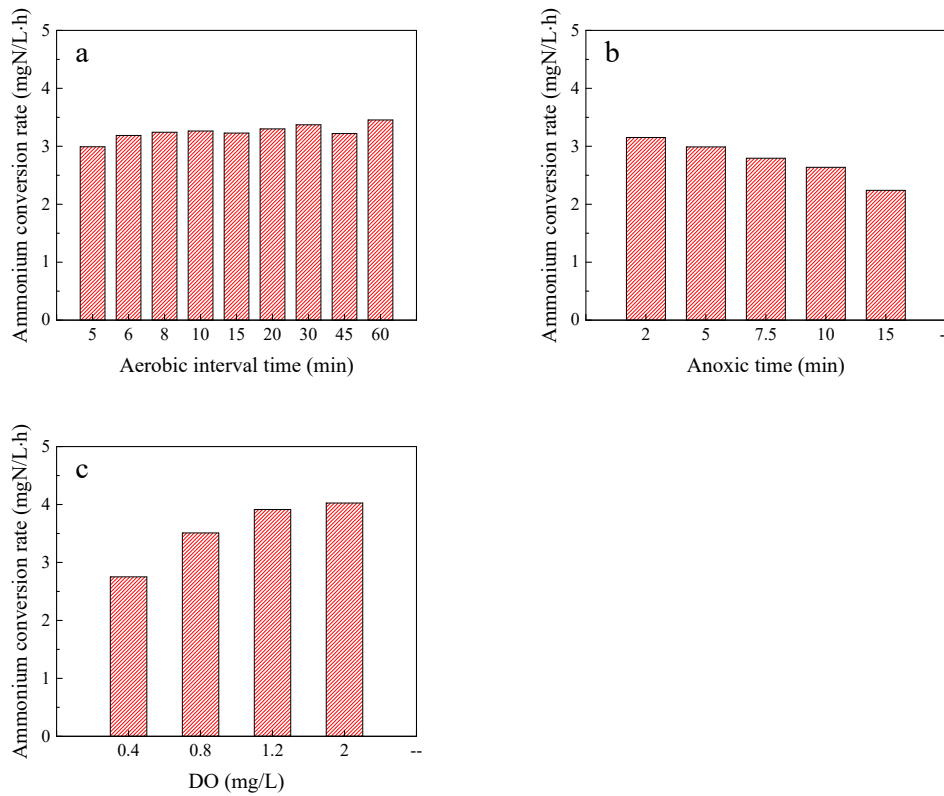

Figure S1. Ammonium oxidation rate under various scenarios
